# Supplementary material for: Isomeric separation of permethylated glycans by extra-long reversed-phase liquid chromatography (RPLC)-MS/MS
Source: Royal Society of Chemistry journal article supplement (doi:10.1039/d2an00010e), 2022-01-01

## Supplementary information

# Isomeric Separation of Permethylated Glycans by Extra-Long Reversed-Phase Liquid Chromatography (RPLC)-MS/MS

Junyao Wang<sup>1</sup>, Xue Dong<sup>1</sup>, Aiyong Yu<sup>1</sup>, Yifan Huang<sup>1</sup>, Wenjing Peng<sup>1</sup> and

Yehia Mechref<sup>1\*</sup>

<sup>1</sup>Department of Chemistry and Biochemistry, Texas Tech University

### **\*Corresponding Author**

Department of Chemistry and Biochemistry  
Texas Tech University  
Lubbock, TX 79409-1061  
Email: [yehia.mechref@ttu.edu](mailto:yehia.mechref@ttu.edu)  
Tel: 806-742-3059  
Fax: 806-742-1289

## Table of contents

**Table S1.** Run-to-run variations in 500mm PepMap C18 column from glycans derived from bovine fetuin. (n=3)

**Table S2.** Run-to-run variations in 500mm PepMap C18 column from glycans derived from human blood serum. (n=3)

**Table S3.** Run-to-run variations in 500mm PepMap C18 column from glycans derived from cultured cells. (n=3)

**Table S4.** Day-to-day variations in 500mm PepMap C18 column from glycans derived from bovine fetuin. (n=3)

**Table S5.** Month-to-month variations in 500mm PepMap C18 column from glycans derived from bovine fetuin. (n=3)

**Table S6.** *N*-glycans with isomeric structures extracted from cultured cell lines. The mass accuracy of each identified structure and the retention time of isomeric peaks are provided. (n=3)

**Figure S1.** EICs of permethylated *N*-glycan standards with the composition of HexNAc<sub>4</sub>Hex<sub>5</sub>NeuAc<sub>1</sub>, analyzed using the 500 mm PepMap C18 column with total elution time of (A) 120 min, (B) 180 min, and (C) 200 min. Symbols: ■, N-acetylglucosamine (GlcNAc); ●, Galactose (Gal); ▼, Fucose (Fuc); ●, Mannose (Man); ●, Glucose (Glc); ◆, N-acetylneuraminic acid (NeuAc/Sialic Acid).

**Figure S2.** (A) TIC of *N*-glycan sample derived from bovine fetuin. (B-D) EICs of permethylated *N*-glycans with sialic acid linkage isomers with the compositions of (B) HexNAc<sub>5</sub>Hex<sub>6</sub>NeuAc<sub>2</sub>, (C) HexNAc<sub>5</sub>Hex<sub>6</sub>NeuAc<sub>3</sub>, and (D) HexNAc<sub>5</sub>Hex<sub>6</sub>NeuAc<sub>4</sub>. (E-G) Distributions of isomers from NMR (blue) and LC/MS (orange). Symbols: see **Figure S1**.

**Figure S3.** TIC and EICs of permethylated *N*-glycans with high mannose structures which were derived from ribonuclease B. Symbols: see **Figure S1**.

**Figure S4.** TIC and EICs of permethylated *N*-glycans with sialic acid linkage isomers which were released from human blood serum. Symbols: see **Figure S1**.

**Figure S5.** TIC and EICs of permethylated glycans which were released from breast cancer cell line MDA-MB-231BR. Symbols: see **Figure S1**.

**Figure S6.** TIC and EICs of permethylated glycans which were released from brain cancer cell line CRL-1620. Symbols: see **Figure S1**.

**Table S1.** Run-to-run variations in 500mm PepMap C18 column from glycans derived from bovine fetuin. (n=3)

| Structure | Average RT(minutes) | Average FWHM(minutes) |
|-----------|---------------------|-----------------------|
|           | 89.8±0.1            | 0.62±0.02             |
|           | 91.4±0.1            | 0.62±0.03             |
|           | 99.5±0.1            | 0.75±0.04             |
|           | 101.0±0.1           | 0.80±0.01             |
|           | 102.9±0.1           | 0.95±0.06             |
|           | 104.0±0.1           | 0.91±0.08             |
|           | 106.5±0.1           | 0.83±0.02             |
|           | 109.0±0.1           | 0.82±0.08             |
|           | 110.0±0.1           | 0.87±0.03             |
|           | 111.8±0.1           | 0.80±0.01             |
|           | 113.2±0.1           | 0.82±0.05             |
|           | 115.0±0.2           | 0.85±0.01             |
|           | 117.7±0.2           | 1.05±0.01             |
|           | 120.4±0.1           | 1.04±0.03             |
|           | 125.9±0.2           | 0.86±0.01             |
|           | 128.3±0.1           | 0.98±0.02             |
|           | 132.6±0.1           | 0.97±0.03             |

**Table S2.** Run-to-run variations in 500mm PepMap C18 column from glycans derived from

| Structure                                                                           | Average RT(minutes) | Average FWHM(minutes) |
|-------------------------------------------------------------------------------------|---------------------|-----------------------|
| 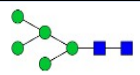   | 85.9±0.1            | 0.71±0.01             |
|    | 114.6±0.1           | 0.96±0.03             |
|    | 105.0±0.1           | 1.17±0.02             |
|                                                                                     | 107.8±0.2           | 1.06±0.04             |
|    | 86.5±0.1            | 0.74±0.01             |
|    | 104.2±0.2           | 1.20±0.01             |
|                                                                                     | 106.8±0.1           | 1.12±0.07             |
|    | 111.0±0.1           | 1.10±0.05             |
|                                                                                     | 117.6±0.1           | 1.22±0.07             |
|  | 122.9±0.1           | 1.38±0.03             |
|                                                                                     | 125.9±0.1           | 1.22±0.03             |
|                                                                                     | 130.4±0.3           | 1.78±0.03             |
|                                                                                     | 131.8±0.2           | 1.50±0.02             |
|                                                                                     | 133.6±0.2           | 1.27±0.06             |
|  | 134.2±0.2           | 1.34±0.04             |
|                                                                                     | 136.6±0.1           | 1.24±0.04             |
|                                                                                     | 140.2±0.1           | 1.25±0.06             |
|  | 135.7±0.1           | 1.37±0.06             |
|                                                                                     | 138.1±0.2           | 1.24±0.04             |
|  | 157.6±0.2           | 1.27±0.08             |
|                                                                                     | 159.9±0.2           | 1.18±0.03             |
|                                                                                     | 162.5±0.2           | 1.19±0.08             |

human blood serum. (n=3)



**Table S3.** Run-to-run variations in 500mm PepMap C18 column from glycans derived from

| Structure                                                                           | Average RT(minutes) | Average FWHM(minutes) |
|-------------------------------------------------------------------------------------|---------------------|-----------------------|
| 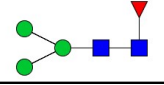   | 79.9±0.1            | 0.74±0.01             |
|    | 87.1±0.1            | 0.83±0.04             |
|                                                                                     | 92.6±0.1            | 1.05±0.01             |
|                                                                                     | 93.6±0.1            | 0.88±0.01             |
|    | 93.6±0.1            | 1.28±0.04             |
|                                                                                     | 101.2±0.1           | 0.78±0.02             |
|    | 113.2±0.1           | 0.92±0.02             |
|                                                                                     | 115.6±0.1           | 0.86±0.01             |
|   | 125.9±0.2           | 1.08±0.01             |
|                                                                                     | 127.9±0.2           | 1.00±0.01             |
|                                                                                     | 130.4±0.3           | 0.92±0.01             |
|                                                                                     | 132.2±0.2           | 0.79±0.01             |
|  | 100.6±0.1           | 0.75±0.04             |
|                                                                                     | 108.8±0.1           | 0.77±0.02             |
|  | 123.3±0.1           | 0.84±0.01             |
|                                                                                     | 126.2±0.1           | 0.91±0.01             |
|  | 135.7±0.1           | 1.21±0.01             |
|                                                                                     | 138.2±0.1           | 1.08±0.02             |
|                                                                                     | 140.7±0.1           | 0.83±0.02             |
|  | 92.8±0.1            | 0.95±0.02             |
|                                                                                     | 95.4±0.1            | 0.94±0.04             |
|                                                                                     | 101.1±0.1           | 1.07±0.02             |
|  | 137.7±0.2           | 1.35±0.07             |
|                                                                                     | 141.4±0.2           | 1.18±0.01             |

cultured cells. (n=3)

**Table S4.** Day-to-day variations in 500mm PepMap C18 column from glycans derived from bovine fetuin. (n=3)

| Structure                                                                           | Average RT(minutes) | Average FWHM(minutes) |
|-------------------------------------------------------------------------------------|---------------------|-----------------------|
|    | 89.5±0.3            | 0.66±0.02             |
|                                                                                     | 91.2±0.3            | 0.71±0.05             |
|    | 99.3±0.3            | 0.74±0.01             |
|                                                                                     | 100.8±0.3           | 0.78±0.02             |
|                                                                                     | 102.7±0.3           | 1.1±0.1               |
|   | 104.1±0.4           | 0.91±0.04             |
|                                                                                     | 106.3±0.3           | 0.86±0.01             |
|                                                                                     | 108.8±0.3           | 0.89±0.07             |
|                                                                                     | 109.7±0.3           | 0.95±0.03             |
|                                                                                     | 111.5±0.4           | 0.85±0.01             |
|  | 113.0±0.3           | 0.72±0.08             |
|                                                                                     | 114.7±0.4           | 0.89±0.02             |
|                                                                                     | 117.5±0.4           | 1.07±0.02             |
|                                                                                     | 120.2±0.3           | 1.21±0.03             |
|  | 125.7±0.4           | 0.82±0.01             |
|                                                                                     | 128.0±0.4           | 0.94±0.01             |
|                                                                                     | 132.3±0.3           | 1.01±0.06             |

**Table S5.** Month-to-month variations in 500mm PepMap C18 column from glycans derived from bovine fetuin. (n=3)

| Structure                                                                           | Average RT(minutes) | Average FWHM(minutes) |
|-------------------------------------------------------------------------------------|---------------------|-----------------------|
| 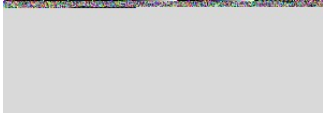   | 89.2±0.6            | 0.68±0.01             |
|                                                                                     | 91.0±0.6            | 0.72±0.04             |
|    | 98.9±0.8            | 0.78±0.06             |
|                                                                                     | 100.4±0.7           | 0.78±0.02             |
|                                                                                     | 102.3±0.7           | 1.1±0.1               |
|   | 103.7±0.9           | 0.91±0.02             |
|                                                                                     | 105.9±0.8           | 0.87±0.03             |
|                                                                                     | 108.4±0.8           | 0.8±0.1               |
|                                                                                     | 109±1               | 0.8±0.1               |
|                                                                                     | 111±1               | 0.89±0.03             |
|  | 113±1               | 0.82±0.03             |
|                                                                                     | 114±1               | 0.91±0.09             |
|                                                                                     | 117±1               | 1.18±0.01             |
|                                                                                     | 119.8±0.8           | 1.2±0.2               |
|  | 125±1               | 0.86±0.06             |
|                                                                                     | 127.6±0.9           | 0.99±0.06             |
|                                                                                     | 131.9±0.9           | 1.02±0.08             |



**Table S6.** *N*-glycans with isomeric structures extracted from cultured cell lines. The mass accuracy of each identified structure and the retention time of isomeric peaks are provided. (n=3)

| Glycan Structure                                                                    | Theoretical <i>m/z</i> | Observed <i>m/z</i> | Mass Accuracy (ppm) | Retention Time (min) |
|-------------------------------------------------------------------------------------|------------------------|---------------------|---------------------|----------------------|
|    | 988.5204               | 988.5242            | 3.84                | 128.1±0.1            |
|                                                                                     |                        |                     |                     | 131.2±0.1            |
|    | 894.9782               | 894.9849            | 7.54                | 93.0±0.1             |
|                                                                                     |                        |                     |                     | 101.0±0.1            |
|    | 1075.5650              | 1075.5734           | 7.81                | 108.9±0.1            |
|                                                                                     |                        |                     |                     | 110.4±0.1            |
|                                                                                     |                        |                     |                     | 112.0±0.1            |
|    | 1090.5703              | 1090.5791           | 8.07                | 114.0±0.1            |
|                                                                                     |                        |                     |                     | 116.6±0.1            |
|    | 915.4914               | 915.4976            | 6.77                | 87.0±0.1             |
|                                                                                     |                        |                     |                     | 92.5±0.1             |
|                                                                                     |                        |                     |                     | 93.6±0.1             |
|    | 1017.5413              | 1017.5472           | 5.80                | 93.5±0.1             |
|                                                                                     |                        |                     |                     | 101.2±0.1            |
|    | 799.0881               | 799.0945            | 8.05                | 115.9±0.1            |
|                                                                                     |                        |                     |                     | 118.8±0.1            |
|   | 809.0916               | 809.0972            | 6.92                | 113.1±0.1            |
|                                                                                     |                        |                     |                     | 115.6±0.1            |
|  | 929.4828               | 929.4871            | 4.59                | 126.4±0.1            |
|                                                                                     |                        |                     |                     | 128.4±0.2            |
|                                                                                     |                        |                     |                     | 130.9±0.1            |
|  | 1119.5912              | 1119.5983           | 6.34                | 100.5±0.1            |
|                                                                                     |                        |                     |                     | 108.7±0.1            |
|  | 1300.1774              | 1300.1882           | 8.31                | 123.3±0.1            |
|                                                                                     |                        |                     |                     | 126.1±0.1            |
|  | 1480.7642              | 1480.7747           | 7.09                | 135.7±0.1            |
|                                                                                     |                        |                     |                     | 138.2±0.1            |
|                                                                                     |                        |                     |                     | 140.7±0.1            |
|  | 1038.0546              | 1038.0607           | 5.92                | 92.8±0.1             |
|                                                                                     |                        |                     |                     | 95.4±0.1             |
|                                                                                     |                        |                     |                     | 100.9±0.2            |
|  | 1140.1045              | 1140.1121           | 6.71                | 117.5±0.1            |
|                                                                                     |                        |                     |                     | 118.8±0.1            |
|  | 1079.2249              | 1079.2329           | 7.44                | 134.8±0.2            |
|                                                                                     |                        |                     |                     | 137.8±0.1            |
|  | 1016.8634              | 1016.8702           | 6.72                | 129.6±0.1            |
|                                                                                     |                        |                     |                     | 131.9±0.1            |
|                                                                                     |                        |                     |                     | 123.6±0.1            |
|  | 962.5056               | 962.5123            | 6.96                | 125.2±0.1            |
|                                                                                     |                        |                     |                     | 127.7±0.1            |

Figure S1

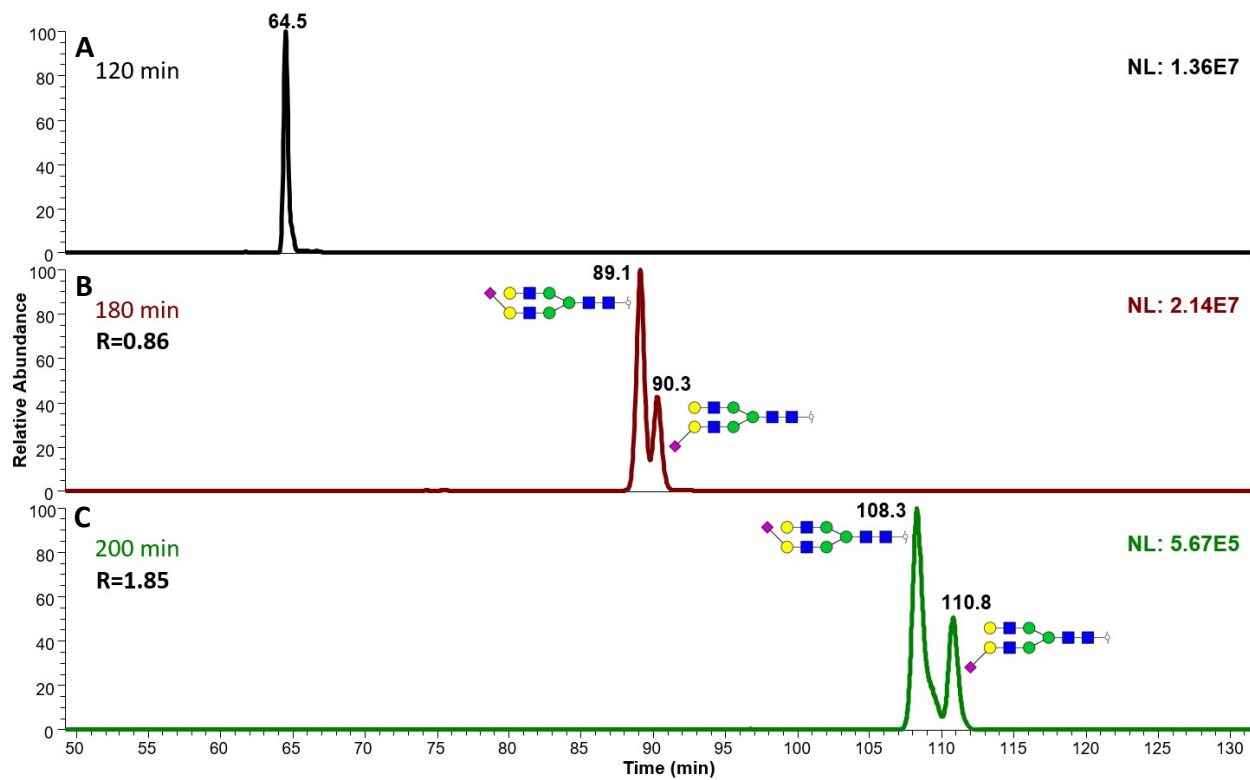

Figure S2

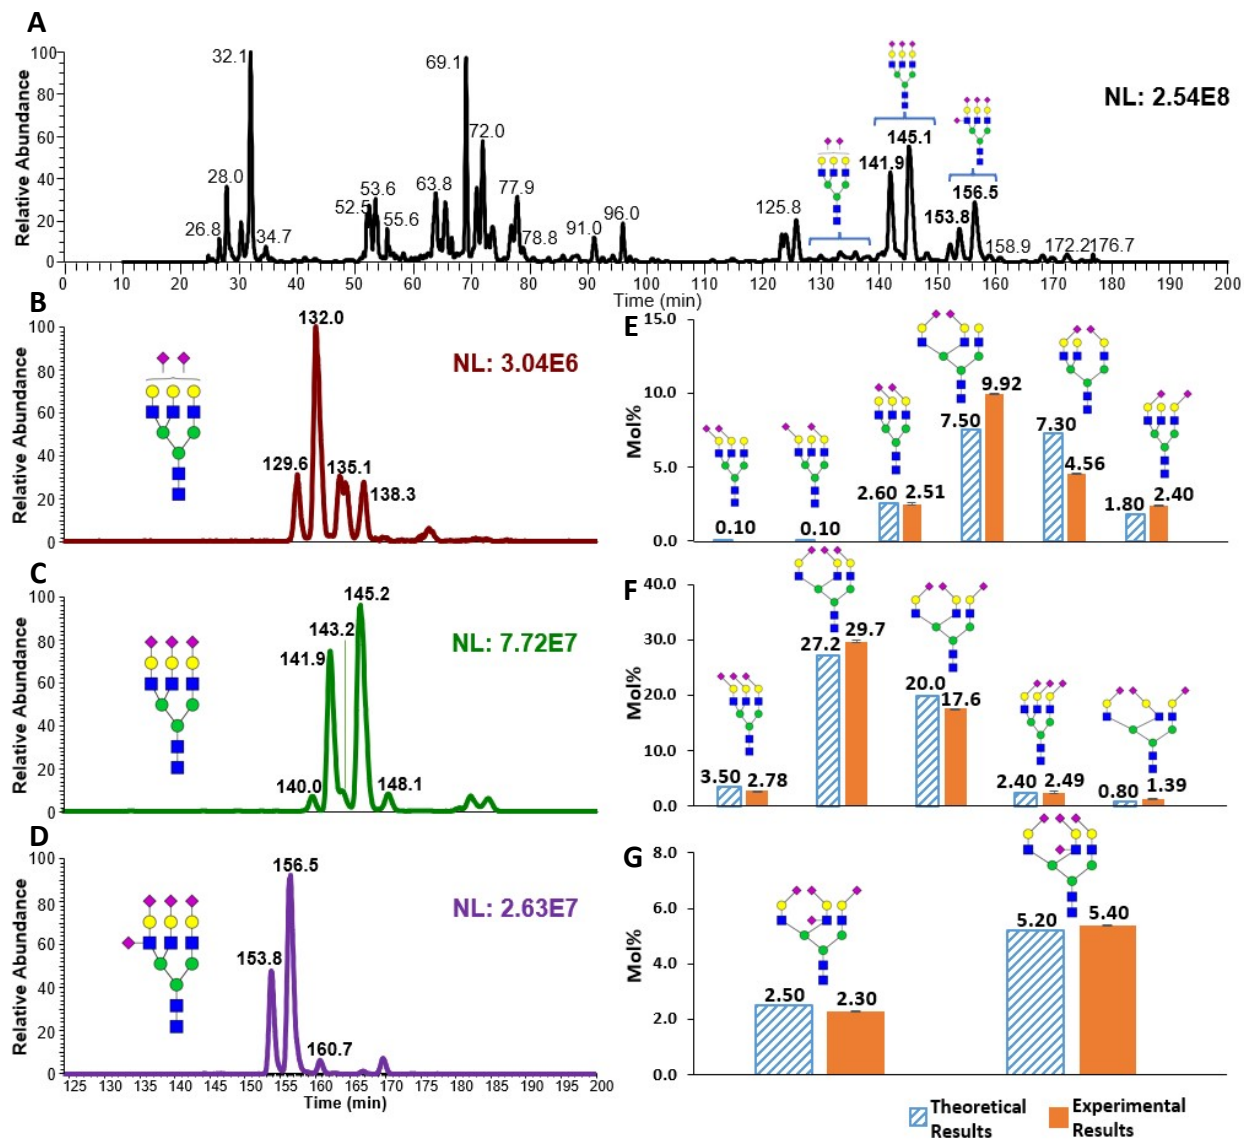

Figure S3

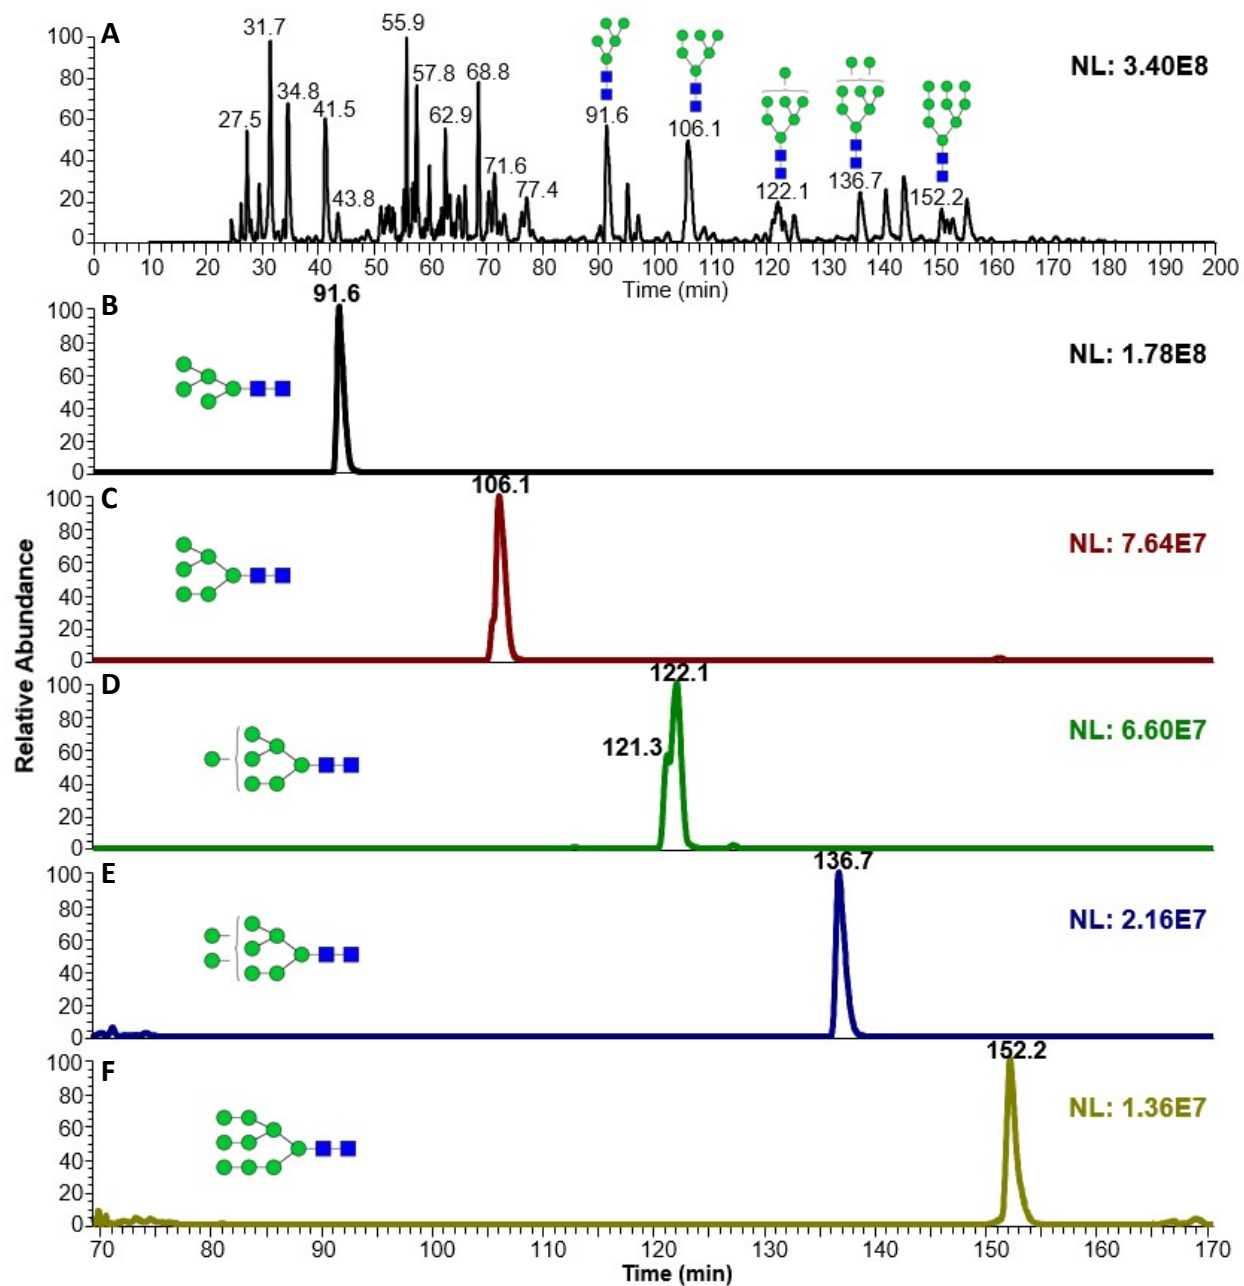

Figure S4

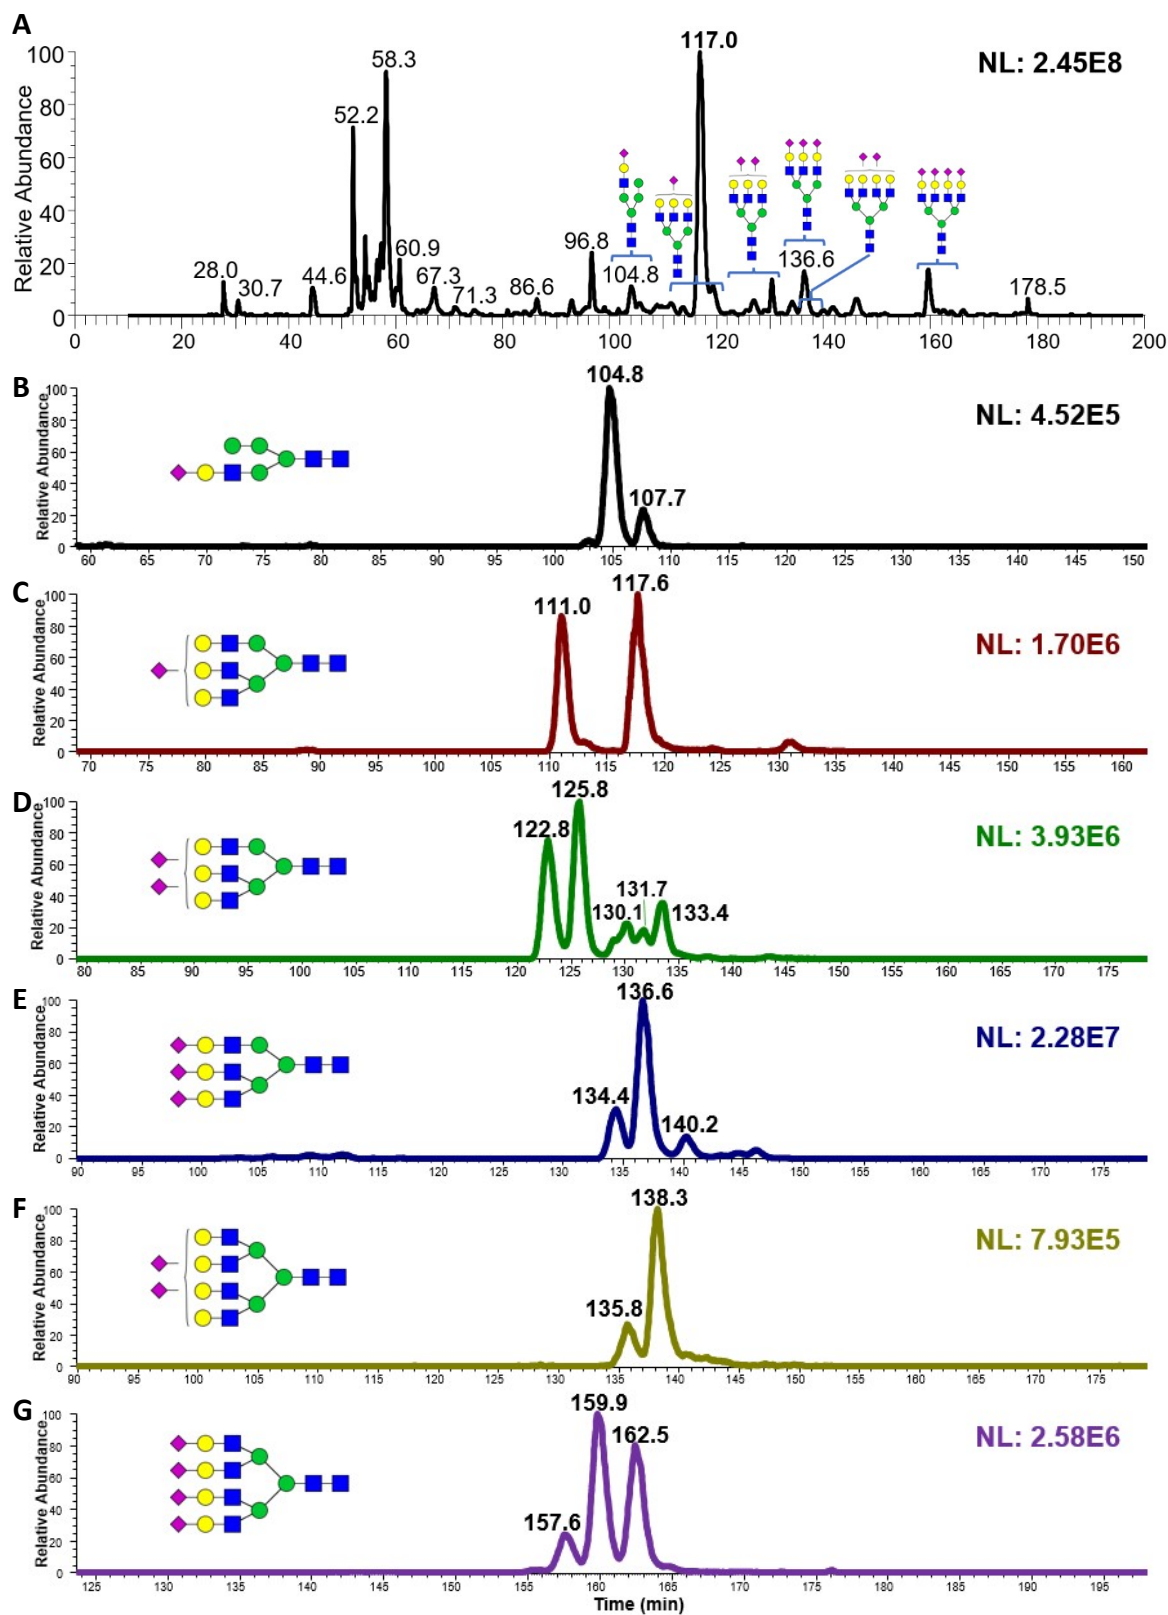

Figure S5

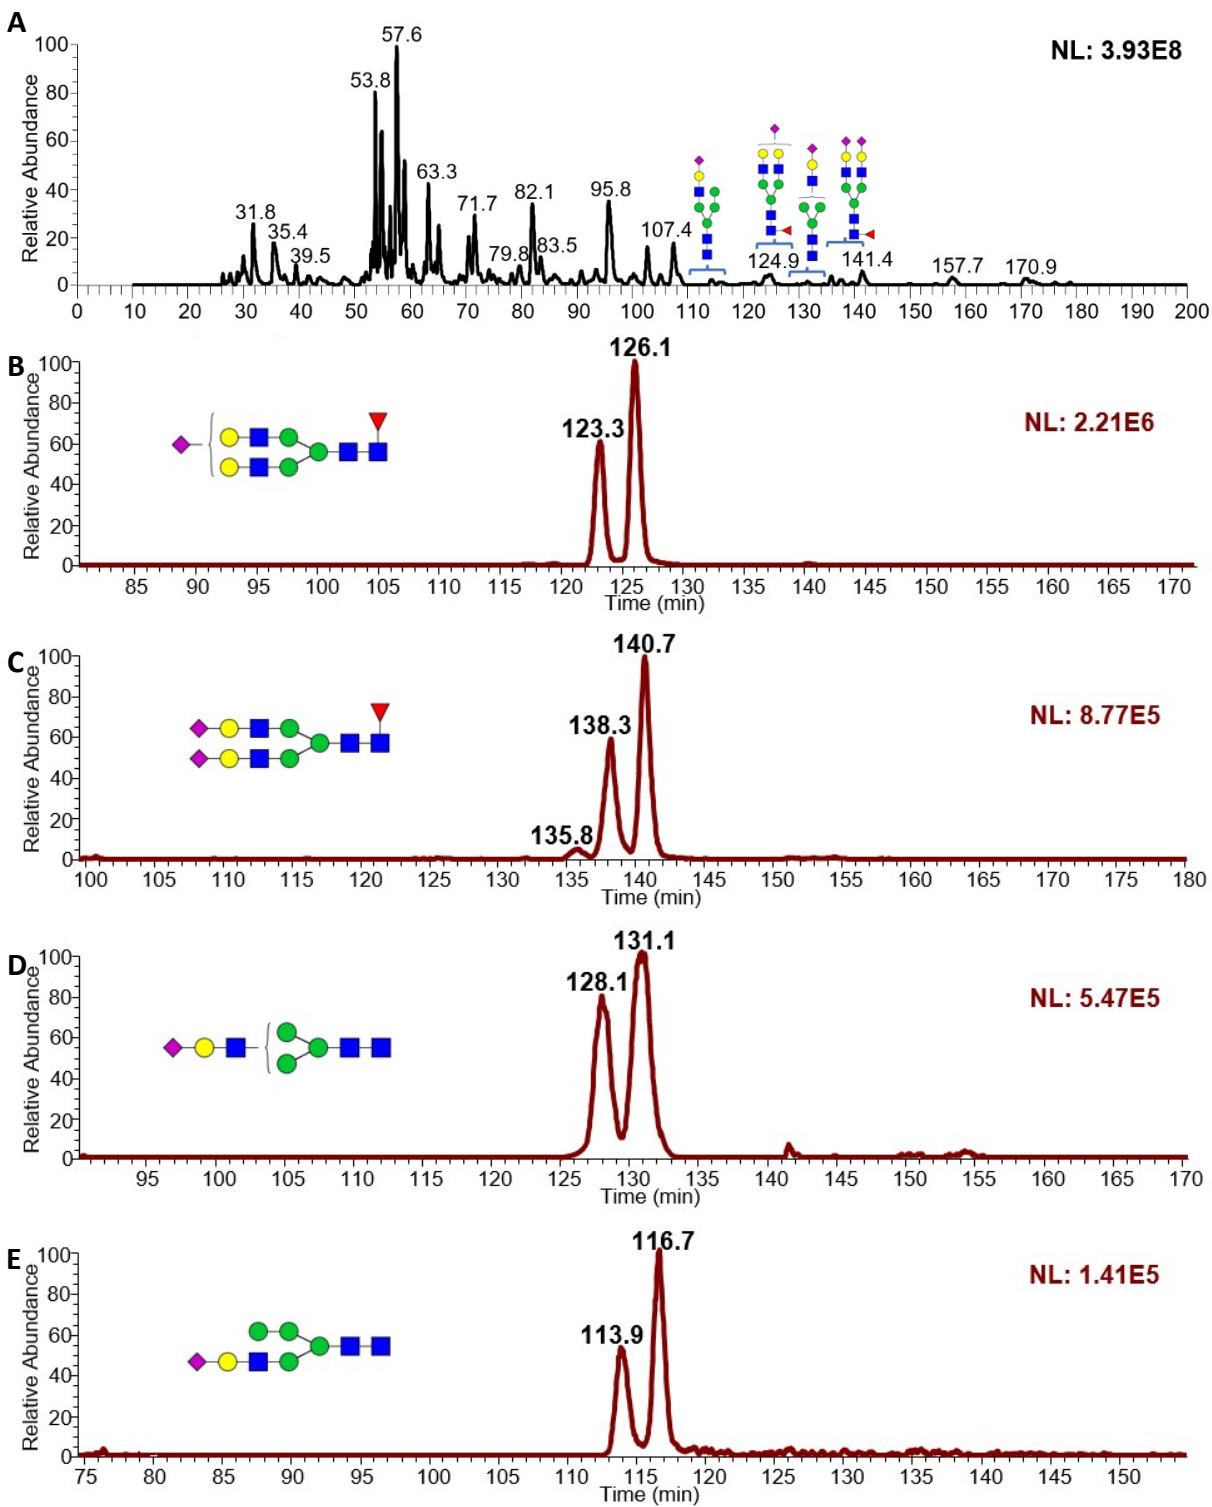

Figure S6

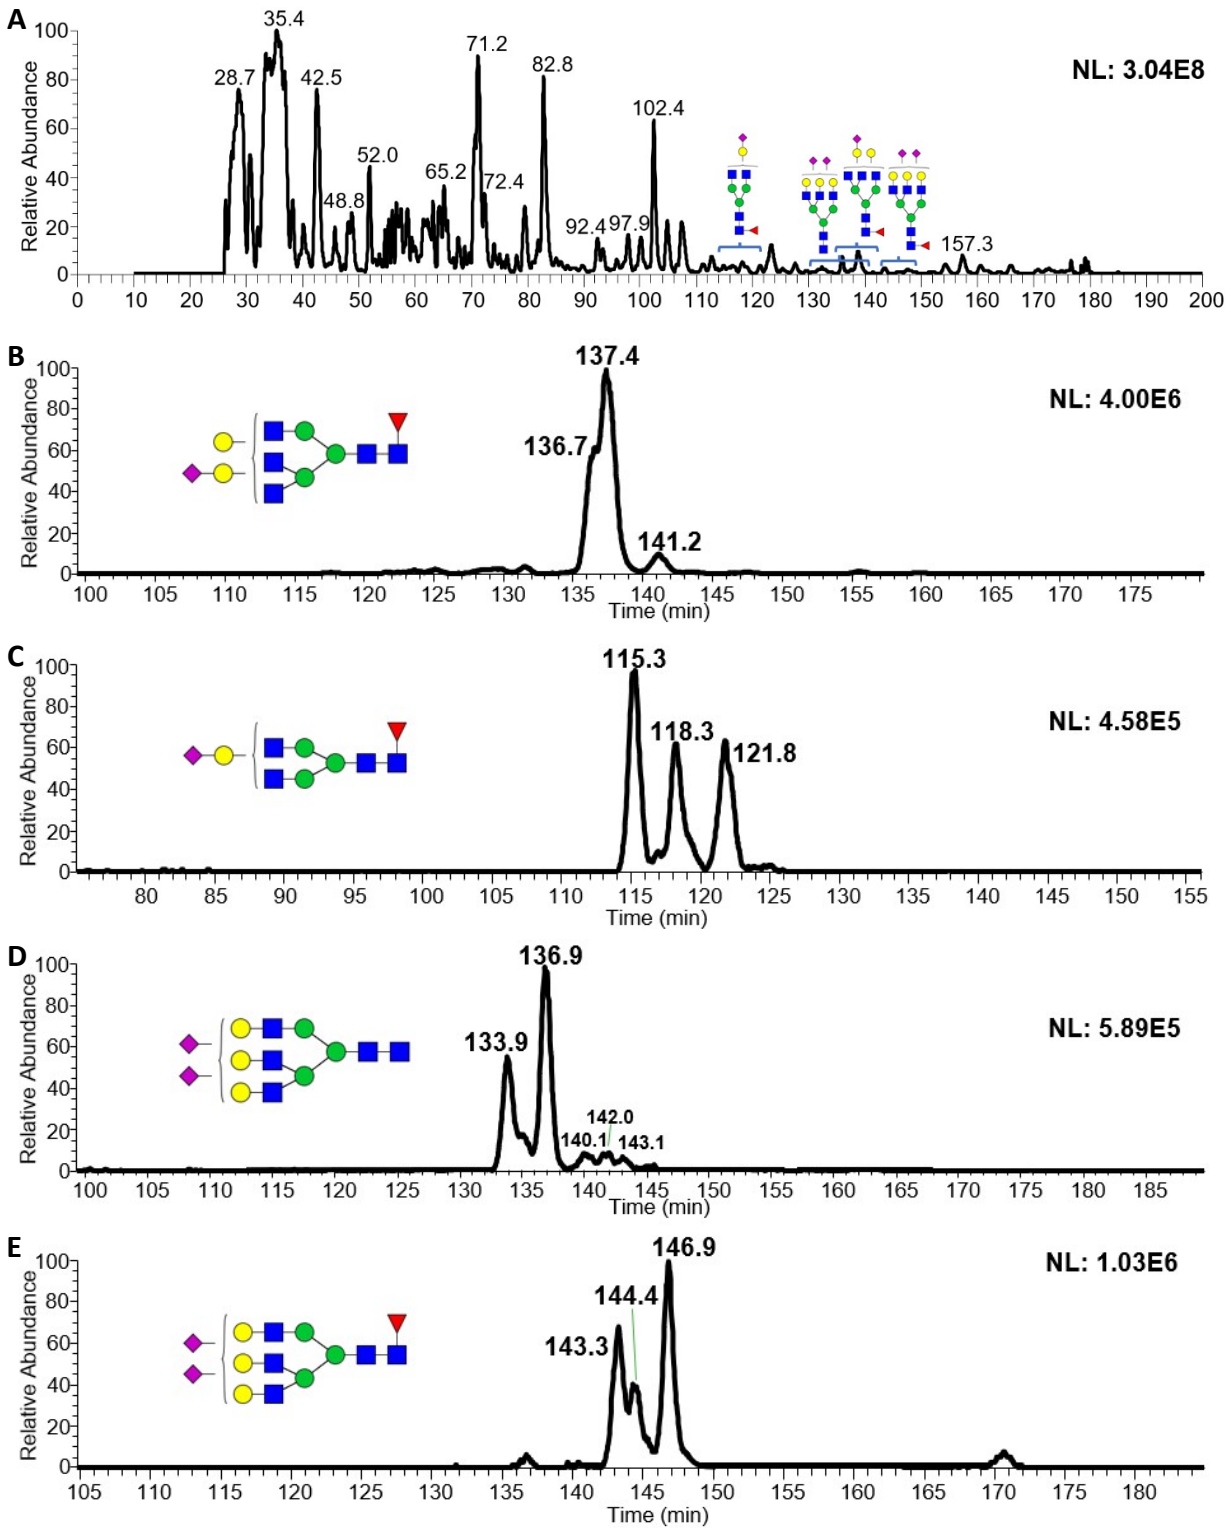

Supplement: d2an00010e1.pdf [file d2an00010e1.pdf]
